# Supplementary figures and images for: Determination of Choline-Containing Compounds in Rice Bran Fermented with Aspergillus oryzae Using Liquid Chromatography/Tandem Mass Spectrometry
Source: PubMed Central journal article supplement — Mass Spectrom (Tokyo). 2024 Aug 8;13(1):A0151. doi: 10.5702/massspectrometry.A0151 (PMC11331278; doi:10.5702/massspectrometry.a0151), 2024-08-08

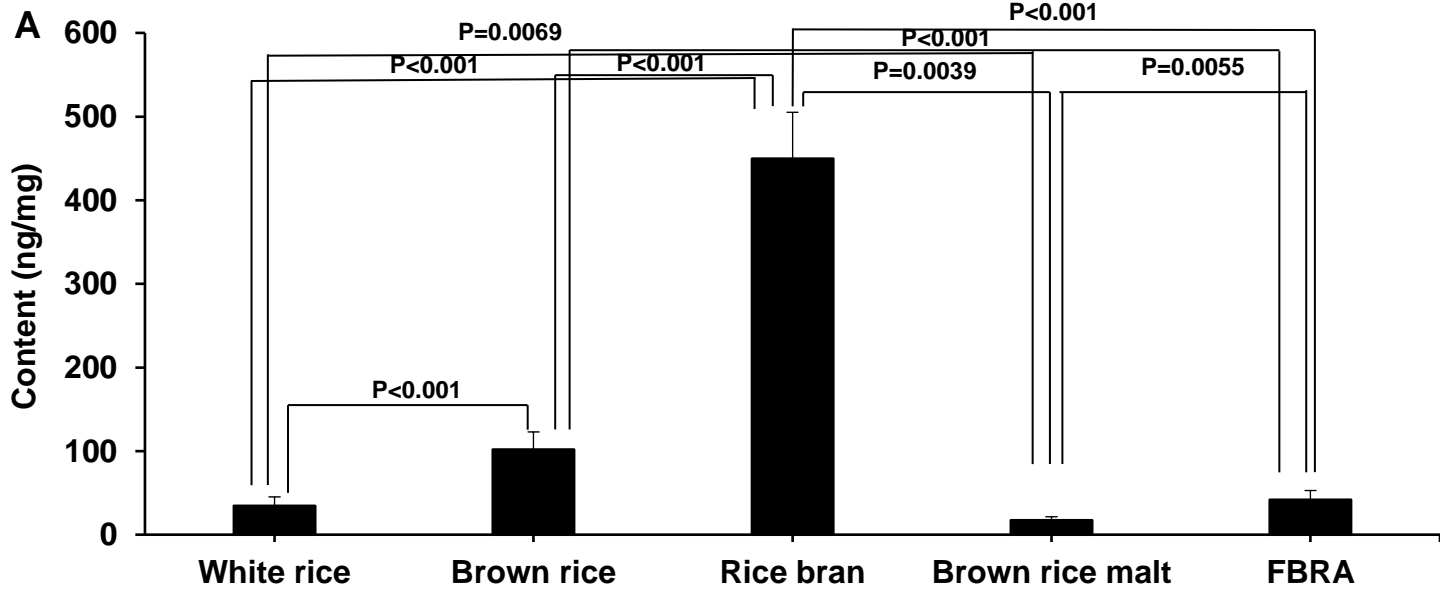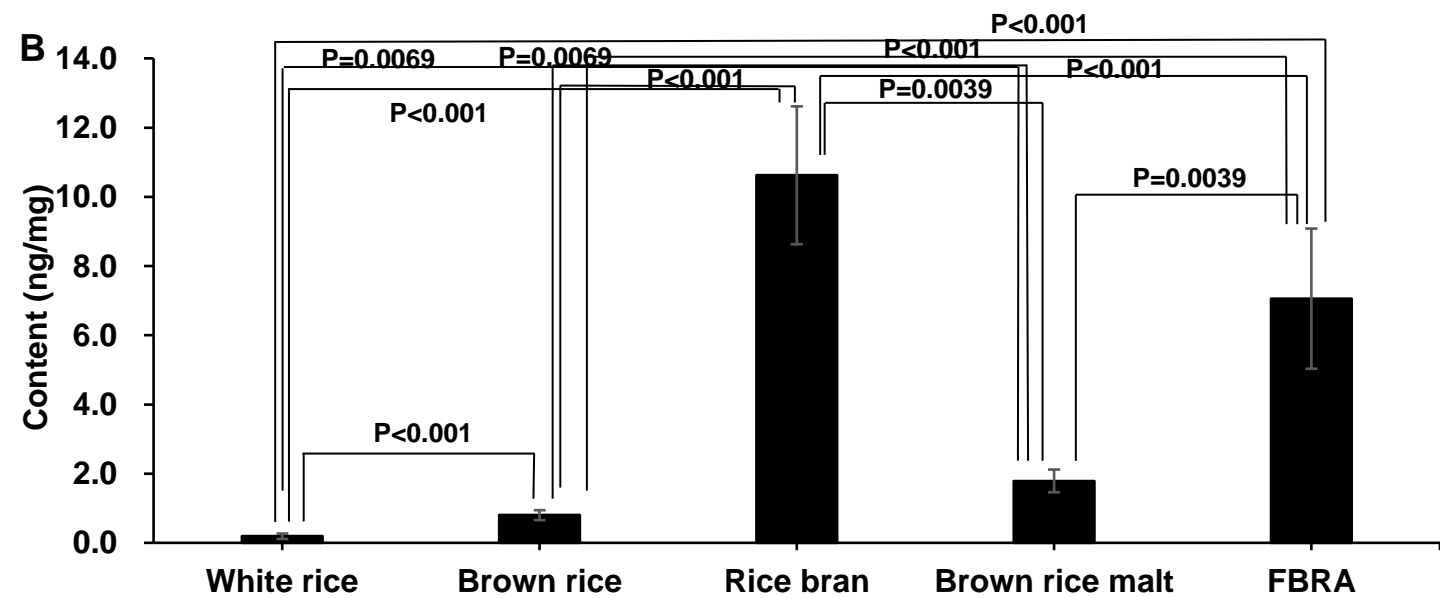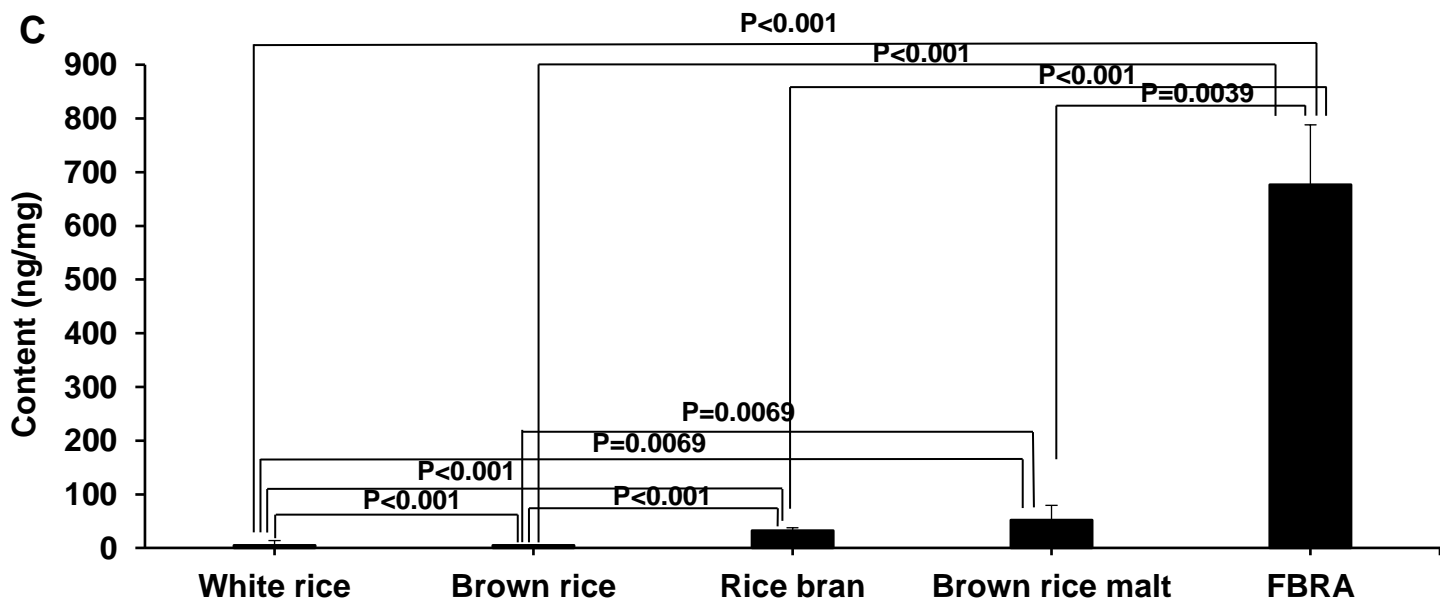

Fig. S1, continued

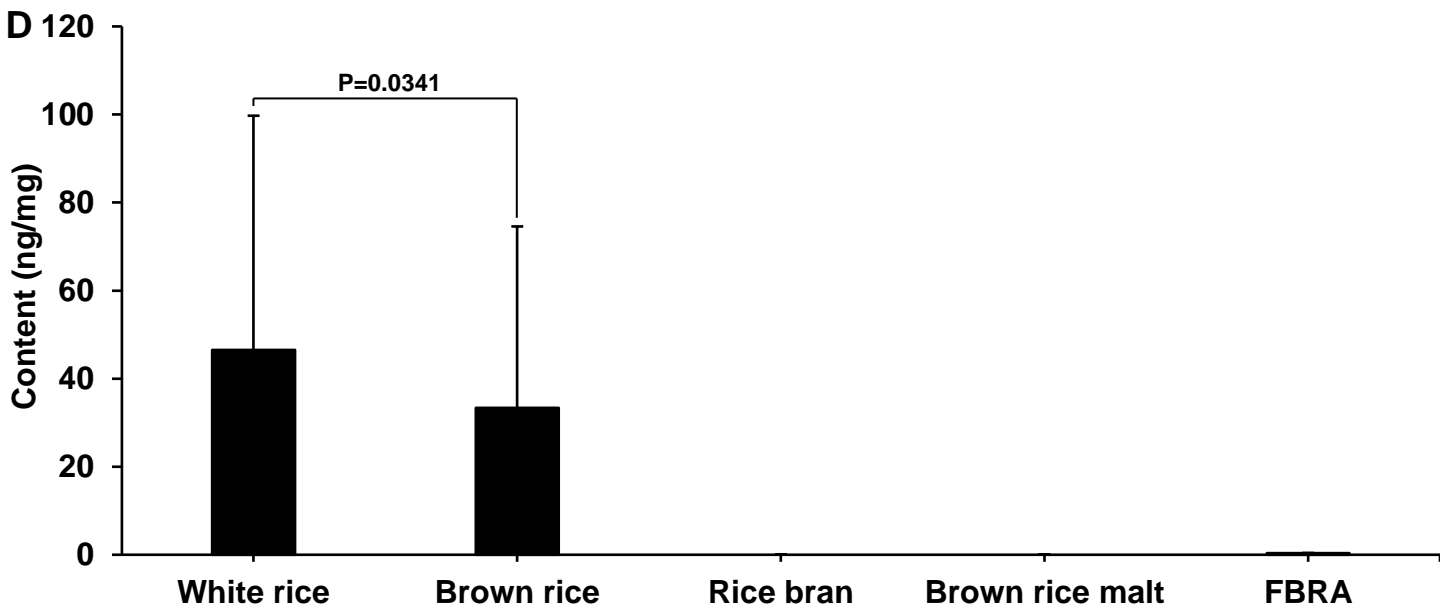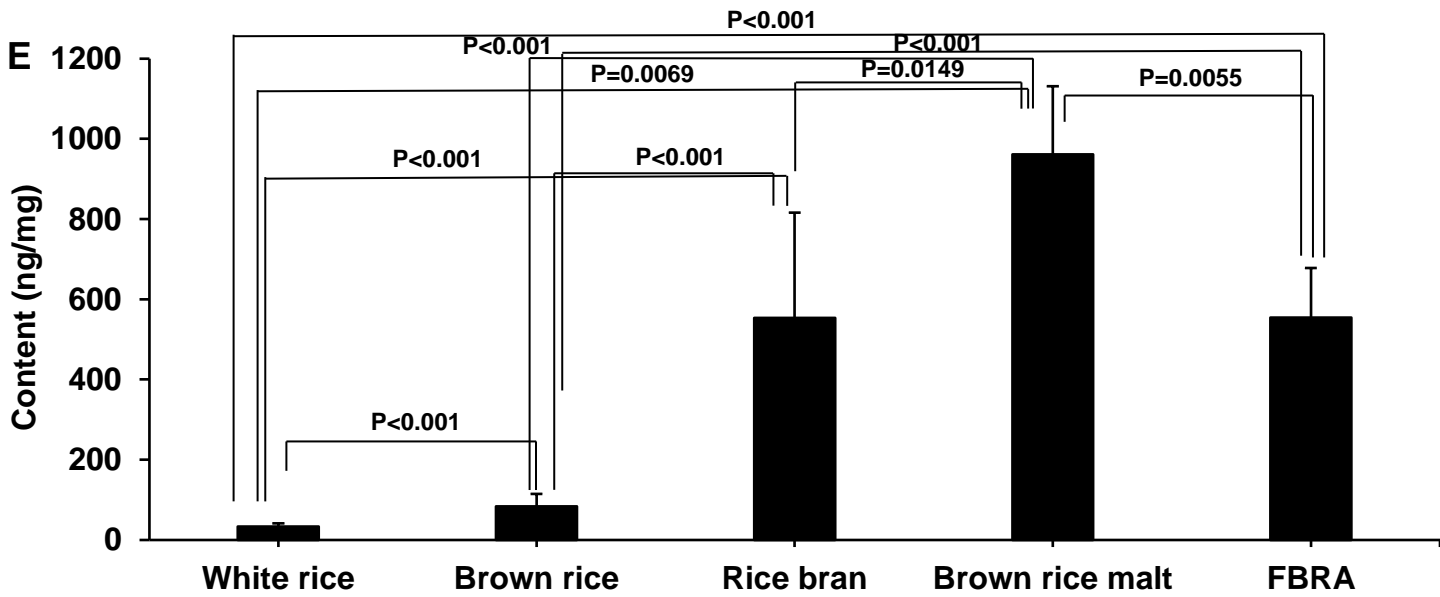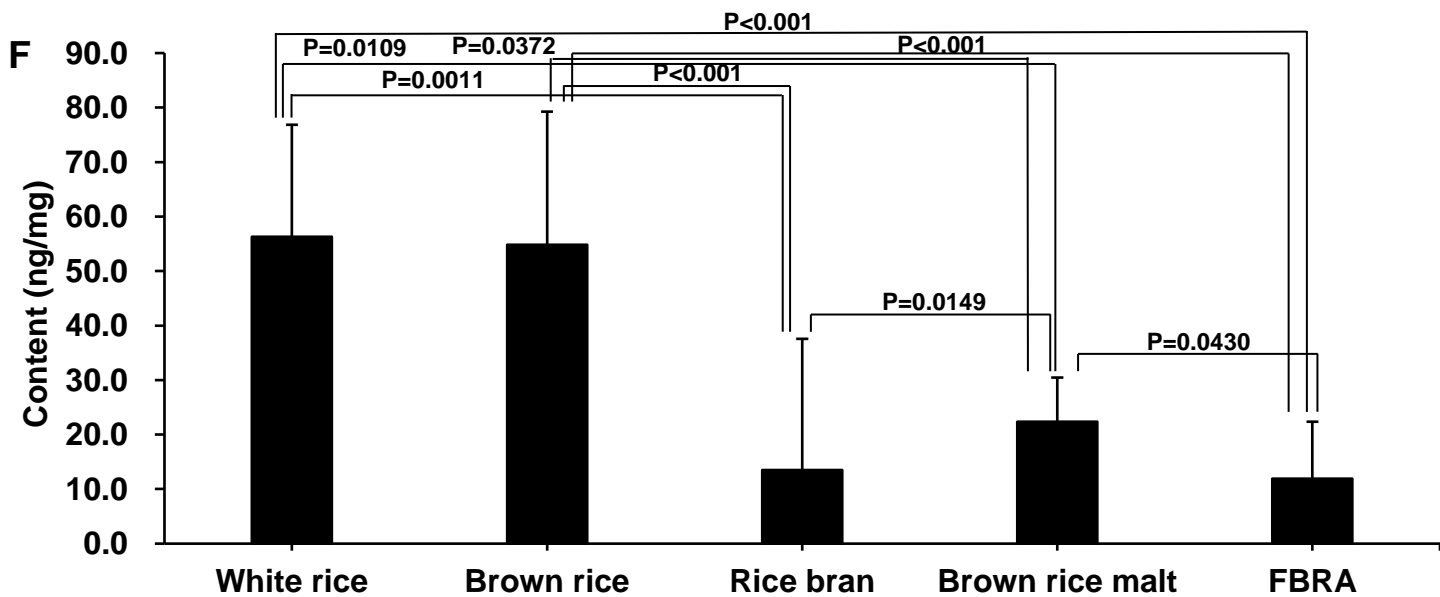

Fig. S1, continued

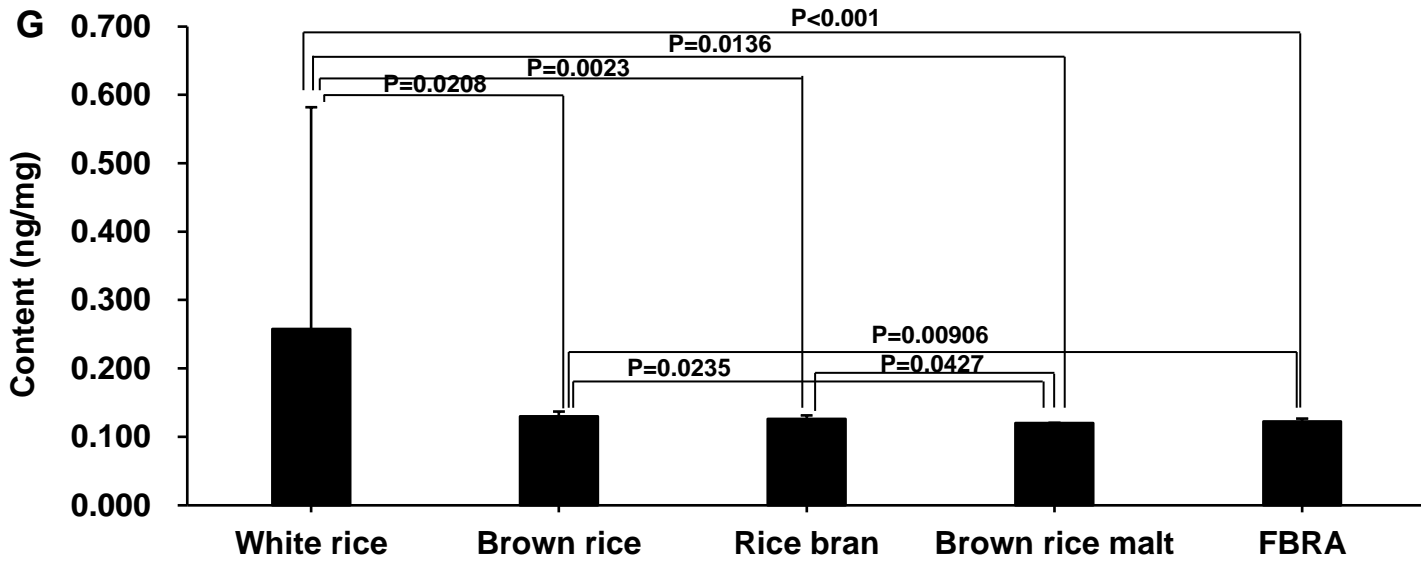

Supplement: Supplementary_Information.pdf [file Supplementary_Information.pdf]
